# Supplementary material for: Chronic cadmium exposure decreases the dependency of MCF7 breast cancer cells on ERα
Source: PubMed Central journal article supplement (PMC6702212; doi:10.1038/s41598-019-46912-3), 2019-08-20
Supplement: 41598_2019_46912_MOESM1_ESM.pdf [file 41598_2019_46912_MOESM1_ESM.pdf]

**TITLE: Chronic cadmium exposure decreases the dependency of MCF7 breast cancer cells on ER $\alpha$**

**AUTHORS:** Mathew Bloomfield<sup>1</sup> and \*Maggie C. Louie<sup>1</sup>

<sup>1</sup>Department of Natural Sciences and Mathematics; Dominican University of California;  
50 Acacia Avenue, San Rafael, CA 94901

\*Corresponding author  
Phone: (415) 485-3248  
Fax: (415) 482-1972  
Email: maggie.louie@dominican.edu

\*Reprint requests should be addressed to the corresponding author.

**EMAIL ADDRESSES**

MCL: maggie.louie@dominican.edu  
MB: mbloomfield@vt.edu

**KEYWORDS: Breast cancer, cadmium, chronic exposure, estrogen receptor, ER $\alpha$**

**A.**

```

MCF7-C22      GCCCCTGGGCGAGGTGTACCTGGACAGCAGCAAGCCCGCC-----GTGTACAACACTACCCCTGTTGCT
Cd12-C16     GCCCCTGGGCGAGGTGTACCTGGACAGCAGCAAGCCCGCC-----GTGTACAACACTACCCCGAGGGCG
MCF7-C24     GCCCCAGGGCGCCGCCCTACCTGGACAAC-----TACCCCGAGGGCG
MCF7-C10     GCCCCTGGGCGAGGTGTACCTGGACAGCAGCAAGCCCGCCGTGTACAAGTGTACAACACTACCCCGAGGGCG
Cd12-C17     GCCCCTGGGCGAGGTGTACCTGGACAGCAGCAAGCCCAAC-----ATGGACATCTAGGAOTACCG--
Cd7-C7       GCCCCTGGGCGAGGTGTACCTGGACAGCAGCAAGCCCGCC-----GTGTACAACACTACCCCTAGG--
Cd7-C9       GCCCCTGGGCGAGGTGTACCTGGACAGCAGCAAGCCCGCC-----GTGTACAACACTACCCCTAGG--
Cd7-C11     GCCCCTGGGCGAGGTGTACCTGGACAGCAGCAAGCCCGCC-----G-----CCGAGGGGCG
MCF7-Ctrl    GCCCCTGGGCGAGGTGTACCTGGACAGCAGCAAGCCCGCC-----GTGTACAACACTACCCCGAGGGCG
Cd-Ctrl      GCCCCTGGGCGAGGTGTACCTGGACAGCAGCAAGCCCGCC-----GTGTACAACACTACCCCGAGGGCG

MCF7-C22      ATTTACAGGCTATTTACAGGCTTGGTATGGTCTGGATTTTGTCCCTCCCACTACCCCGAG--GGCGC
Cd12-C16     -----COGCCTACGAGTTTCAGCCGATCTG
MCF7-C24     -----COGCCTACGAGTTTCAC--GCCGC
MCF7-C10     -----GGACCCTCAGGCGCCGCTACCAACGCCCGCCGCTGCGAGTTCACC--GCCGC
Cd12-C17     -----CCACCTAGGAGTTTCAC--ACCGC
Cd7-C7       -----TAGTACTTCTAC--CCCGA
Cd7-C9       -----AAC--GCCGC
Cd7-C11     -----COGCCTACGAGTTTCAC--GCCGC
MCF7-Ctrl    -----COGCCTACGAGTTTCAC--GCCGC
Cd-Ctrl      -----COGCCTACGAGTTTCAC--GCCGC

```

**B.**

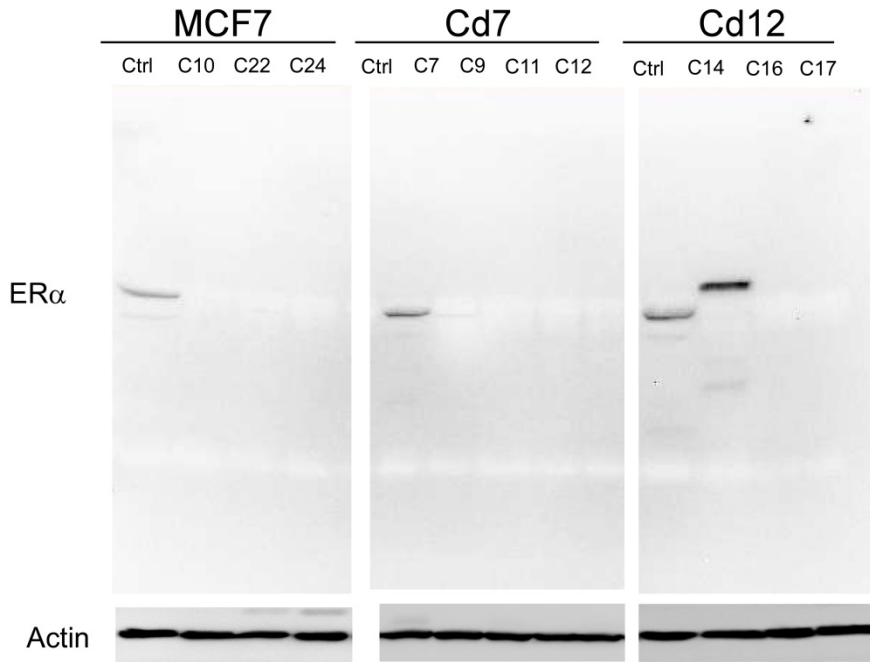

**Supplementary Figure S1. Generation of ER $\alpha$ -KO clones using the CRISPR/Cas9 gene-editing system.** (A) DNA sequence alignment showing a region that flanks the CRISPR target sequence showing the presence of insertion or deletion mutations (shown in red letters) in single cell-derived clones after transfection with plasmids containing sgRNA oligos and Cas9 enzyme. (B) The presence or absence of ER $\alpha$  in control or CRISPR-transfected clones was verified using western blot analysis with actin as the loading control.

A.

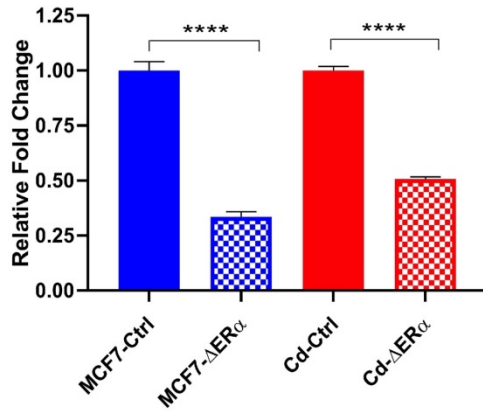

B.

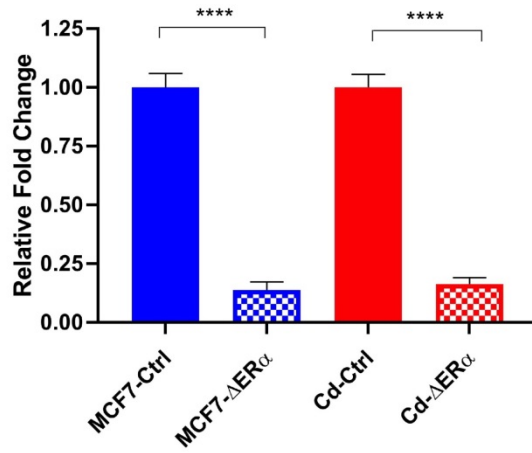

**Supplementary Figure S2. Normalized invasion and colony formation abilities of MCF7- $\Delta$ ER $\alpha$  and Cd- $\Delta$ ER $\alpha$  clones.** Bar graphs of the invasiveness (A) and tumorigenicity (B) of the MCF7- $\Delta$ ER $\alpha$  and Cd- $\Delta$ ER $\alpha$  clones shown as relative fold change to normalize for baseline differences existing between MCF7 and Cd cells (\*\*\*\* $p < 0.0001$ ).

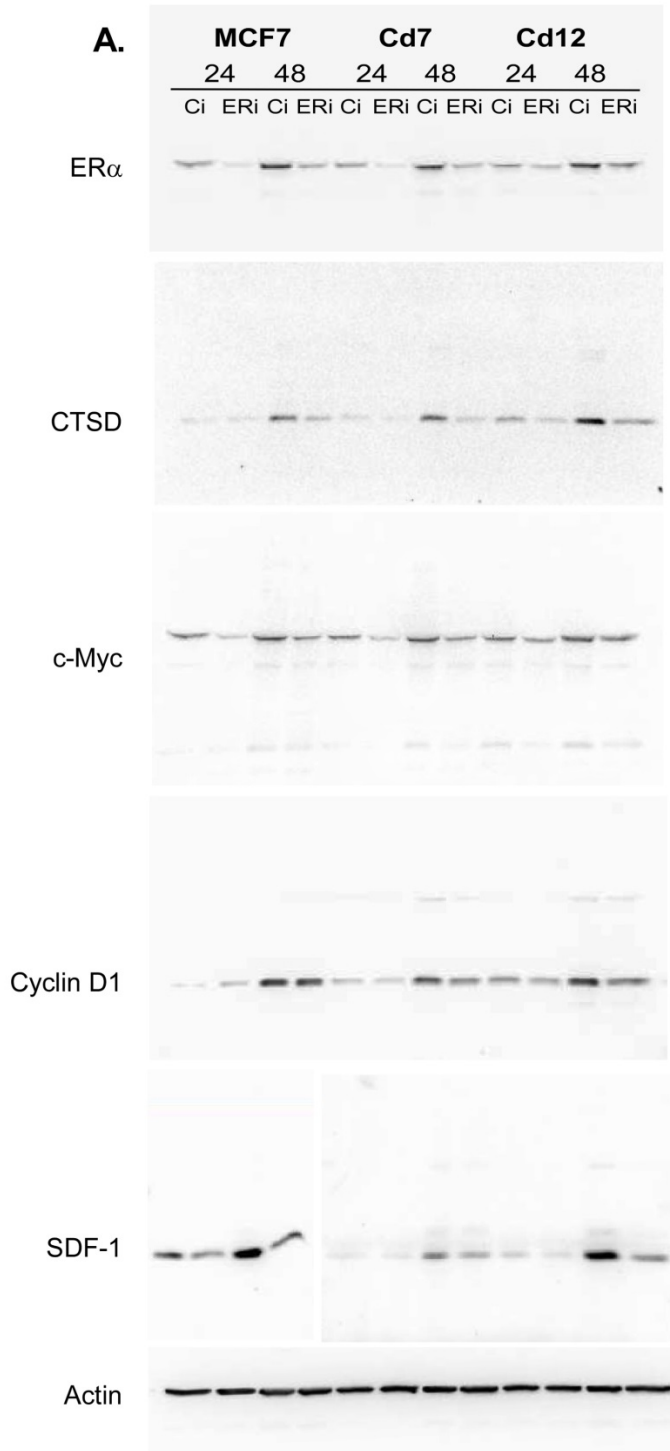

**Supplementary Figure S3. Full-length of Western Blot Images for Figure 4C.**

MCF7, Cd7, and Cd12 cells were transfected with si-ER $\alpha$  (ERi) or si-control (Ci) and cell lysates were collected from MCF7, Cd7, and Cd12 cells 24 or 48 hours after ER $\alpha$  knockdown for protein expression analysis using western blots with actin as the loading control. #SDF-1 blot is composed of two blots—one with MCF7 cells and the other with Cd7 and Cd12 cells, each transfected with either si-ER $\alpha$  or si-control.

**A. GO Molecular Function**

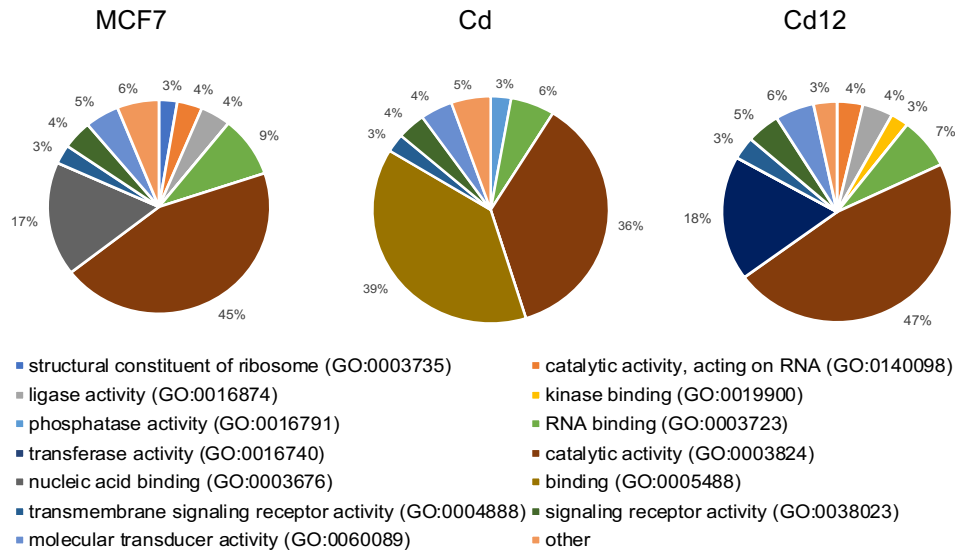

**B. GO Biological Process**

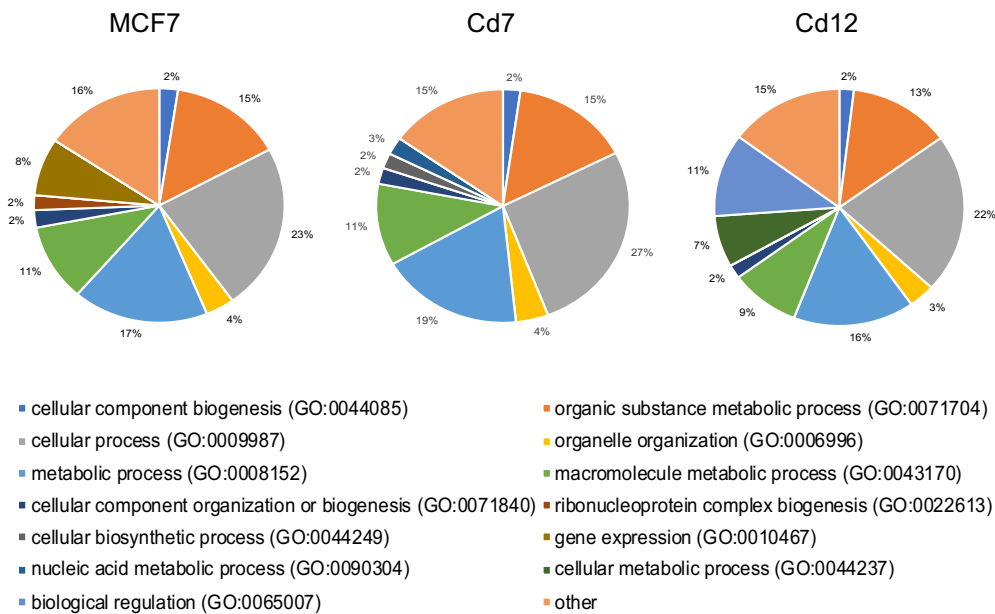

**Supplementary Figure S4. Enrichment of GO terms in MCF7, Cd7, and Cd12 cells after ER $\alpha$  knockdown.** Pie charts showing the over-represented (A) Molecular Function and (B) Biological Process using PANTHER GO-Slim in parental and cadmium-adapted MCF7 cells following exposure to ICI. Annotations where the corresponding number of DE genes was less than 1% were categorized as “other.”
